# Supplementary material
Source: Springer Nature journal article supplement (https://www.springermedizin.de/resource/supplementary/12955_2013_1409_MOESM1_ESM.pdf/9559106)

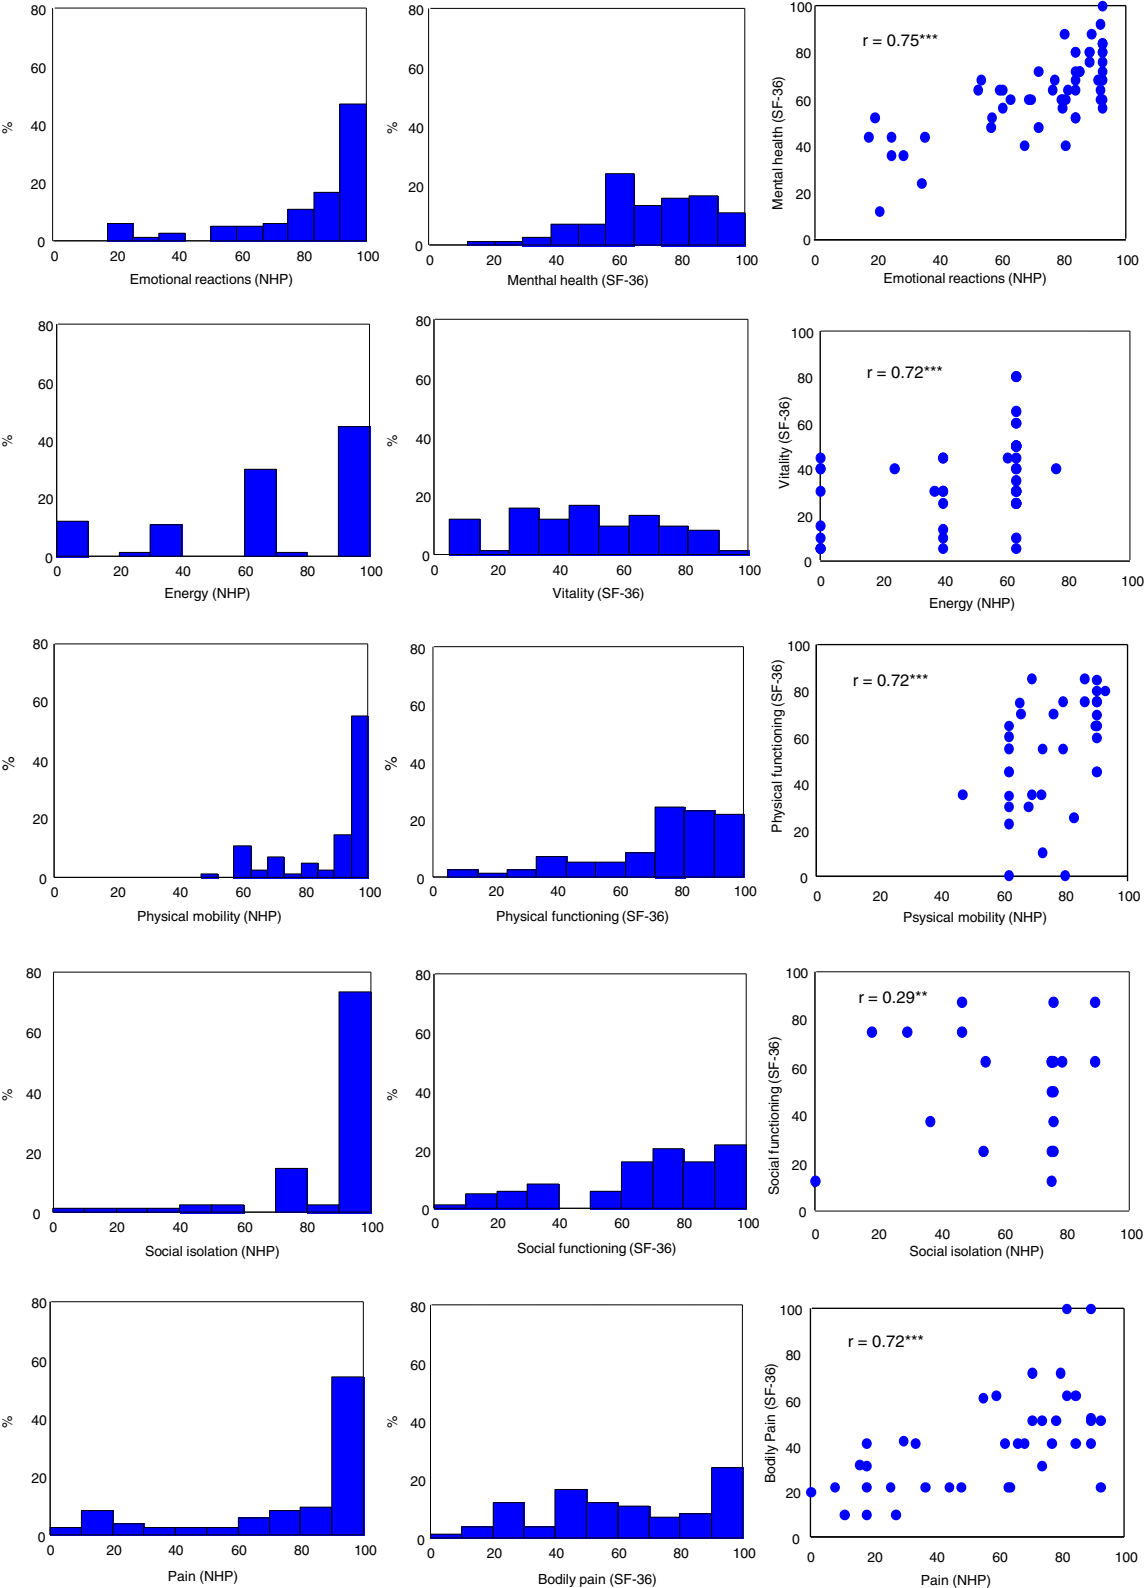

Supplement: MOESM1 [file 9559106]
